# Supplementary material for: The Role of Consolidation Chemoradiotherapy in Locally Advanced Pancreatic Cancer Receiving Chemotherapy: An Updated Systematic Review and Meta-Analysis
Source: PubMed Central journal article supplement — Cancer Res Treat. 2017 Jun 9;50(2):562–74. doi: 10.4143/crt.2017.105 (PMC5912129; doi:10.4143/crt.2017.105), 2017-06-09
Supplement: crt-2017-105-suppl1.pdf [file crt-2017-105-suppl1.pdf]

**S1 Table.** PICOS criteria for inclusion and exclusion of studies

---

|               |                                                                                                                                            |
|---------------|--------------------------------------------------------------------------------------------------------------------------------------------|
| Population    | Locally advanced pancreatic ductal adenocarcinoma                                                                                          |
| Interventions | Chemoradiotherapy followed by at least one cycle of induction chemotherapy                                                                 |
| Control       | Chemotherapy alone                                                                                                                         |
| Outcomes      | Primary end point: 1-year survival rate<br>Secondary end points : median survival, progression free survival, toxicity and resection rate. |
| Study design  | Prospective phase II or randomized study                                                                                                   |

---

PICOS, participants, interventions, comparisons, outcomes, and study design.
