# Supplementary material for: The Role of Consolidation Chemoradiotherapy in Locally Advanced Pancreatic Cancer Receiving Chemotherapy: An Updated Systematic Review and Meta-Analysis
Source: PubMed Central journal article supplement — Cancer Res Treat. 2017 Jun 9;50(2):562–74. doi: 10.4143/crt.2017.105 (PMC5912129; doi:10.4143/crt.2017.105), 2017-06-09
Supplement: crt-2017-105-suppl2.pdf [file crt-2017-105-suppl2.pdf]

**S2 Table.** Articles retrieved from different electronic databases

| Electronic database | Retrieved | Unique study |
|---------------------|-----------|--------------|
| Embase.com          | 871       | 859          |
| Medline             | 1,018     | 159          |
| Web-of-science      | 841       | 841          |
| PubMed publisher    | 991       | 800          |
| Total               | 4,436     | 2,659        |

Last search in electronic databases performed on 7 January 2016.
