# Supplementary material for: The Role of Consolidation Chemoradiotherapy in Locally Advanced Pancreatic Cancer Receiving Chemotherapy: An Updated Systematic Review and Meta-Analysis
Source: PubMed Central journal article supplement — Cancer Res Treat. 2017 Jun 9;50(2):562–74. doi: 10.4143/crt.2017.105 (PMC5912129; doi:10.4143/crt.2017.105), 2017-06-09
Supplement: crt-2017-105-suppl10.pdf [file crt-2017-105-suppl10.pdf]

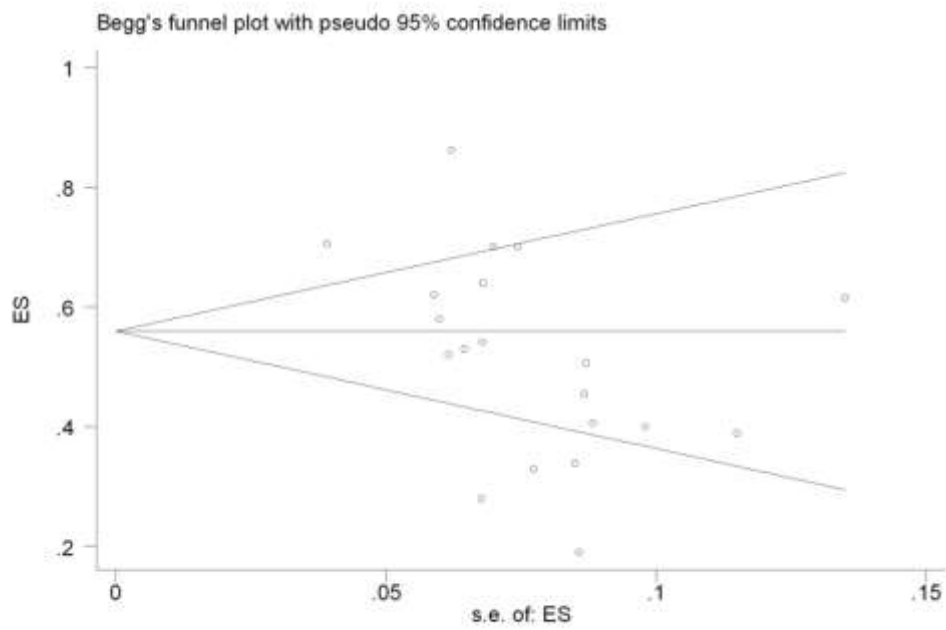

ICT+CCRT groups (Egger's T test  $p=0.04$ )

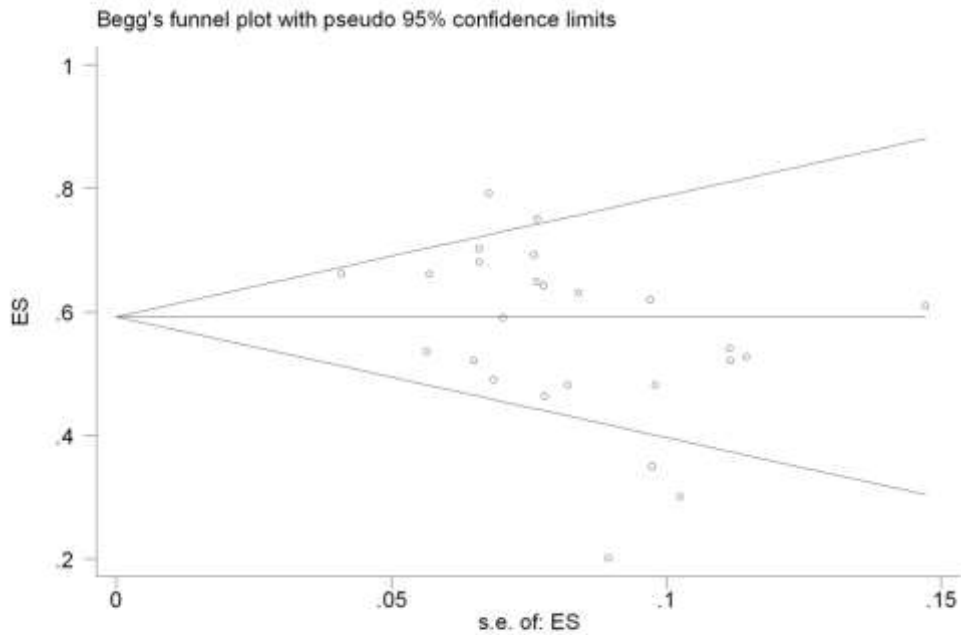

**S10 Fig.** Funnel plots. Chemotherapy groups (Egger's T test  $p=0.02$ ). ICT, induction chemotherapy; CCRT, chemoradiation.
